# Supplementary material for: A series of Anderson-type polyoxometalate-based metal–organic complexes: their pH-dependent electrochemical behaviour, and as electrocatalysts and photocatalysts
Source: Royal Society of Chemistry journal article supplement (doi:10.1039/c6dt02216b), 2016-01-01
Supplement: c6dt02216b1.pdf [file c6dt02216b1.pdf]

## A Series of Anderson-type Polyoxometalate-based Metal–organic Complexes: pH-dependent electrochemical behaviours and as Electrocatalysts and Photocatalysts

Xiuli Wang,\*<sup>a</sup> Junjun Sun, Hongyan Lin, Zhihan Chang, Xiang Wang and Guocheng Liu

**Table. S1.** Selected bond distances (Å) and angles (°) for the title complexes.

| Complex 1                                     |            |                    |            |
|-----------------------------------------------|------------|--------------------|------------|
| O(1)-Cu(1)                                    | 1.990(4)   | N(1)-Cu(2)         | 2.002(5)   |
| O(1W)-Cu(1)                                   | 2.173(5)   | Cu(1)-O(3)         | 1.953(4)   |
| Cu(1)-O(2W)                                   | 1.963(4)   | Cu(1)-N(3)         | 1.981(5)   |
| N(2)-Cu(2)                                    | 1.975(4)   | Cu(2)-O(4)         | 1.920(4)   |
| Cu(2)-O(7)#1                                  | 1.936(4)   | O(7)-Cu(2)#1       | 1.936(4)   |
| Mo(1)-O(1)-Cu(1)                              | 140.6(2)   | C(10)-N(1)-Cu(2)   | 129.4(4)   |
| C(6)-N(1)-Cu(2)                               | 111.5(4)   | O(3)-Cu(1)-O(2W)   | 172.16(19) |
| O(3)-Cu(1)-N(3)                               | 88.03(18)  | O(2W)-Cu(1)-N(3)   | 97.67(19)  |
| O(3)-Cu(1)-O(1)                               | 87.43(17)  | O(2W)-Cu(1)-O(1)   | 85.57(18)  |
| N(3)-Cu(1)-O(1)                               | 162.84(18) | O(3)-Cu(1)-O(1W)   | 93.48(19)  |
| O(2W)-Cu(1)-O(1W)                             | 91.0(2)    | N(3)-Cu(1)-O(1W)   | 98.3(2)    |
| O(1)-Cu(1)-O(1W)                              | 98.5(2)    | O(4)-Cu(2)-O(7)#1  | 87.94(17)  |
| O(4)-Cu(2)-N(2)                               | 175.08(19) | O(7)#1-Cu(2)-N(2)  | 95.36(18)  |
| O(4)-Cu(2)-N(1)                               | 95.51(18)  | O(7)#1-Cu(2)-N(1)  | 164.42(18) |
| N(2)-Cu(2)-N(1)                               | 82.28(18)  |                    |            |
| Symmetry codes for <b>1</b> : #1 -x,-y-1,-z+1 |            |                    |            |
| Complex 2                                     |            |                    |            |
| Cu(1)-O(1W)                                   | 1.985(6)   | Cu(1)-O(4W)        | 1.970(6)   |
| Cu(1)-N(1)                                    | 2.017(7)   | Cu(1)-O(3W)        | 2.026(6)   |
| Cu(1)-O(2W)                                   | 2.185(6)   | O(1W)-Cu(1)-O(4W)  | 172.6(3)   |
| O(1W)-Cu(1)-N(1)                              | 90.9(3)    | O(4W)-Cu(1)-N(1)   | 89.2(3)    |
| O(1W)-Cu(1)-O(3W)                             | 89.6(3)    | O(4W)-Cu(1)-O(3W)  | 89.7(3)    |
| N(1)-Cu(1)-O(3W)                              | 174.6(3)   | O(1W)-Cu(1)-O(2W)  | 87.8(3)    |
| O(4W)-Cu(1)-O(2W)                             | 99.6(2)    | N(1)-Cu(1)-O(2W)   | 94.2(3)    |
| O(3W)-Cu(1)-O(2W)                             | 91.2(3)    |                    |            |
| Complex 3                                     |            |                    |            |
| Cu(1)-N(1)                                    | 1.990(3)   | Cu(1)-O(1W)        | 1.997(3)   |
| Cu(1)-N(1)#1                                  | 1.990(3)   | Cu(1)-O(1W)#1      | 1.997(3)   |
| Cu(1)-O(1)                                    | 2.393(2)   | Cu(1)-O(1)#1       | 2.393(2)   |
| N(1)-Cu(1)-N(1)#1                             | 180.0(15)  | N(1)-Cu(1)-O(1W)   | 89.17(11)  |
| N(1)#1-Cu(1)-O(1W)                            | 90.83(11)  | N(1)-Cu(1)-O(1W)#1 | 90.83(11)  |

|                      |            |                      |            |
|----------------------|------------|----------------------|------------|
| N(1)#1-Cu(1)-O(1W)#1 | 89.17(11)  | O(1W)-Cu(1)-O(1W)#1  | 180.000(2) |
| N(1)-Cu(1)-O(1)      | 87.72(9)   | N(1)#1-Cu(1)-O(1)    | 92.28(9)   |
| O(1W)-Cu(1)-O(1)     | 93.73(9)   | O(1W)#1-Cu(1)-O(1)   | 86.27(9)   |
| N(1)-Cu(1)-O(1)#1    | 92.28(9)   | N(1)#1-Cu(1)-O(1)#1  | 87.72(9)   |
| O(1W)-Cu(1)-O(1)#1   | 86.27(9)   | O(1W)#1-Cu(1)-O(1)#1 | 93.73(9)   |
| O(1)-Cu(1)-O(1)#1    | 180.000(1) |                      |            |

Symmetry codes for **3**: #1 -x+2,-y+1,-z+2

| Complex 4            |           |                    |            |
|----------------------|-----------|--------------------|------------|
| Cu(1)-O(4)           | 1.953(19) | Cu(1)-N(1)         | 1.987(3)   |
| Cu(1)-O(7)#2         | 2.018(2)  | Cu(1)-O(2)         | 2.128(2)   |
| Cu(1)-O(1)           | 2.161(2)  | Cu(1)-O(3)         | 2.307(3)   |
| Cu(2)-O(5)           | 1.926(2)  | Cu(2)-O(6)         | 1.934(2)   |
| Cu(2)-O(4)#4         | 1.967(2)  | Cu(2)-O(4)         | 1.975(2)   |
| Cu(2)-O(3)#4         | 2.358(2)  | Cu(2)-Cu(2)#4      | 2.9880(7)  |
| O(3)-Cu(2)#4         | 2.358(2)  | O(4)-Cu(2)#4       | 1.967(2)   |
| O(7)-Cu(1)#2         | 2.018(2)  | O(4)-Cu(1)-N(1)    | 176.80(10) |
| O(4)-Cu(1)-O(7)#2    | 89.94(8)  | N(1)-Cu(1)-O(7)#2  | 89.98(10)  |
| O(4)-Cu(1)-O(2)      | 86.24(9)  | N(1)-Cu(1)-O(2)    | 93.35(10)  |
| O(7)#2-Cu(1)-O(2)    | 170.28(9) | O(4)-Cu(1)-O(1)    | 92.42(8)   |
| N(1)-Cu(1)-O(1)      | 90.78(10) | O(7)#2-Cu(1)-O(1)  | 93.28(9)   |
| O(2)-Cu(1)-O(1)      | 95.80(9)  | O(4)-Cu(1)-O(3)    | 83.58(8)   |
| N(1)-Cu(1)-O(3)      | 93.22(10) | O(7)#2-Cu(1)-O(3)  | 89.42(9)   |
| O(2)-Cu(1)-O(3)      | 81.29(9)  | O(1)-Cu(1)-O(3)    | 175.19(9)  |
| O(5)-Cu(2)-O(6)      | 90.31(9)  | O(5)-Cu(2)-O(4)#4  | 168.51(9)  |
| O(6)-Cu(2)-O(4)#4    | 97.05(9)  | O(5)-Cu(2)-O(4)    | 94.33(9)   |
| O(6)-Cu(2)-O(4)      | 161.62(9) | O(4)#4-Cu(2)-O(4)  | 81.43(8)   |
| O(5)-Cu(2)-O(3)#4    | 88.56(9)  | O(6)-Cu(2)-O(3)#4  | 95.17(9)   |
| O(4)#4-Cu(2)-O(3)#4  | 81.95(8)  | O(4)-Cu(2)-O(3)#4  | 102.13(9)  |
| O(5)-Cu(2)-Cu(2)#4   | 134.02(7) | O(6)-Cu(2)-Cu(2)#4 | 135.09(7)  |
| O(4)#4-Cu(2)-Cu(2)#4 | 40.82(6)  | O(4)-Cu(2)-Cu(2)#4 | 40.60(6)   |
| O(3)#4-Cu(2)-Cu(2)#4 | 92.68(7)  |                    |            |

Symmetry codes for **4**: #2 -x+1,-y+2,-z+1 #4 -x,-y+2,-z+1

| Complex 5          |            |                    |            |
|--------------------|------------|--------------------|------------|
| Cu(1)-O(3W)        | 1.953(2)   | Cu(1)-O(2W)        | 1.988(3)   |
| Cu(1)-N(1)         | 2.003(3)   | Cu(1)-O(1)         | 2.004(3)   |
| Cu(1)-O(1W)        | 2.274(3)   | Cu(1)-O(3)#1       | 2.355(3)   |
| O(3W)-Cu(1)-O(2W)  | 90.59(11)  | O(3W)-Cu(1)-N(1)   | 174.67(12) |
| O(2W)-Cu(1)-N(1)   | 93.10(11)  | O(3W)-Cu(1)-O(1)   | 87.07(11)  |
| O(2W)-Cu(1)-O(1)   | 177.66(10) | N(1)-Cu(1)-O(1)    | 89.23(11)  |
| O(3W)-Cu(1)-O(1W)  | 92.97(11)  | O(2W)-Cu(1)-O(1W)  | 87.28(11)  |
| N(1)-Cu(1)-O(1W)   | 91.04(11)  | O(1)-Cu(1)-O(1W)   | 92.89(10)  |
| O(3W)-Cu(1)-O(3)#1 | 91.22(11)  | O(2W)-Cu(1)-O(3)#1 | 90.85(10)  |
| N(1)-Cu(1)-O(3)#1  | 84.90(11)  | O(1)-Cu(1)-O(3)#1  | 89.15(10)  |
| O(1W)-Cu(1)-O(3)#1 | 175.43(10) |                    |            |

Symmetry codes for **5**: #1 -x,-y+4,-z-1

| Complex 6            |            |                      |            |
|----------------------|------------|----------------------|------------|
| Cu(1)-N(1)#2         | 1.994(4)   | Cu(1)-N(1)           | 1.994(4)   |
| Cu(1)-O(1W)#2        | 2.007(3)   | Cu(1)-O(1W)          | 2.007(3)   |
| Cu(1)-O(1)#2         | 2.293(3)   | Cu(1)-O(1)           | 2.293(3)   |
| Cu(2)-O(4W)          | 1.949(4)   | Cu(2)-O(2W)          | 2.002(4)   |
| Cu(2)-N(2)           | 2.011(4)   | Cu(2)-O(3W)          | 2.024(4)   |
| Cu(2)-O(2)           | 2.317(3)   | Cu(2)-O(3)           | 2.350(3)   |
| N(1)#2-Cu(1)-N(1)    | 180.0(3)   | N(1)#2-Cu(1)-O(1W)#2 | 89.23(15)  |
| N(1)-Cu(1)-O(1W)#2   | 90.77(15)  | N(1)#2-Cu(1)-O(1W)   | 90.77(15)  |
| N(1)-Cu(1)-O(1W)     | 89.23(15)  | O(1W)#2-Cu(1)-O(1W)  | 180.0(1)   |
| N(1)#2-Cu(1)-O(1)#2  | 91.56(14)  | N(1)-Cu(1)-O(1)#2    | 88.44(14)  |
| O(1W)#2-Cu(1)-O(1)#2 | 84.01(13)  | O(1W)-Cu(1)-O(1)#2   | 95.98(13)  |
| N(1)#2-Cu(1)-O(1)    | 88.44(14)  | N(1)-Cu(1)-O(1)      | 91.56(14)  |
| O(1W)#2-Cu(1)-O(1)   | 95.98(13)  | O(1W)-Cu(1)-O(1)     | 84.01(13)  |
| O(1)#2-Cu(1)-O(1)    | 180.0(13)  | O(4W)-Cu(2)-O(2W)    | 86.84(18)  |
| O(4W)-Cu(2)-N(2)     | 175.94(18) | O(2W)-Cu(2)-N(2)     | 91.44(17)  |
| O(4W)-Cu(2)-O(3W)    | 88.51(18)  | O(2W)-Cu(2)-O(3W)    | 172.11(14) |
| N(2)-Cu(2)-O(3W)     | 93.60(17)  | O(4W)-Cu(2)-O(2)     | 90.60(14)  |
| O(2W)-Cu(2)-O(2)     | 102.47(13) | N(2)-Cu(2)-O(2)      | 86.17(14)  |
| O(3W)-Cu(2)-O(2)     | 83.94(13)  | O(4W)-Cu(2)-O(3)     | 93.50(14)  |
| O(2W)-Cu(2)-O(3)     | 86.07(13)  | N(2)-Cu(2)-O(3)      | 90.05(14)  |
| O(3W)-Cu(2)-O(3)     | 87.86(13)  | O(2)-Cu(2)-O(3)      | 170.73(12) |

Symmetry codes for **6**: #2 -x,-y+1,-z

| Complex 7         |            |                   |           |
|-------------------|------------|-------------------|-----------|
| Cu(1)-O(3W)       | 1.963(4)   | Cu(1)-O(2)        | 1.984(4)  |
| Cu(1)-O(2W)       | 1.985(4)   | Cu(1)-N(1)        | 2.012(4)  |
| Cu(1)-O(1W)       | 2.278(4)   | Cu(1)-O(1)        | 2.370(5)  |
| O(3W)-Cu(1)-O(2)  | 176.99(17) | O(3W)-Cu(1)-O(2W) | 90.85(19) |
| O(2)-Cu(1)-O(2W)  | 86.13(19)  | O(3W)-Cu(1)-N(1)  | 93.86(18) |
| O(2)-Cu(1)-N(1)   | 89.13(18)  | O(2W)-Cu(1)-N(1)  | 172.0(2)  |
| O(3W)-Cu(1)-O(1W) | 90.65(18)  | O(2)-Cu(1)-O(1W)  | 89.55(16) |
| O(2W)-Cu(1)-O(1W) | 93.4(2)    | N(1)-Cu(1)-O(1W)  | 93.01(18) |
| O(3W)-Cu(1)-O(1)  | 89.69(16)  | O(2)-Cu(1)-O(1)   | 90.15(16) |
| O(2W)-Cu(1)-O(1)  | 87.4(2)    | N(1)-Cu(1)-O(1)   | 86.21(17) |
| O(1W)-Cu(1)-O(1)  | 179.17(16) |                   |           |

**Table S2a.** Selected hydrogen–bonding geometry (Å, °) for complex **1**

| D–H···A            | D–H  | H···A | D···A | D–H···A |
|--------------------|------|-------|-------|---------|
| C(9)–H(9A)···O(26) | 0.93 | 2.56  | 3.262 | 133     |

**Table S2b.** Selected hydrogen-bonding geometry (Å, °) for complex **2**

| D–H⋯A            | D–H  | H⋯A  | D⋯A    | D–H⋯A |
|------------------|------|------|--------|-------|
| C(7)–H(7A) ⋯O(2) | 0.93 | 2.55 | 3.3355 | 142   |

**Table S2c.** Selected hydrogen-bonding geometry (Å, °) for complex **3**

| D–H⋯A               | D–H  | H⋯A  | D⋯A      | D–H⋯A |
|---------------------|------|------|----------|-------|
| C(12)–H(12A) ⋯O(8), | 0.93 | 2.37 | 3.167(5) | 143   |

**Table S2d.** Selected hydrogen-bonding geometry (Å, °) for complex **5**

| D–H⋯A              | D–H  | H⋯A  | D⋯A      | D–H⋯A |
|--------------------|------|------|----------|-------|
| N(4)–H(4C) ⋯O(12), | 0.86 | 1.78 | 2.639(4) | 177   |
| O3W–H3WB ⋯O(7)     | 0.85 | 2.48 | 2.922(4) | 113   |

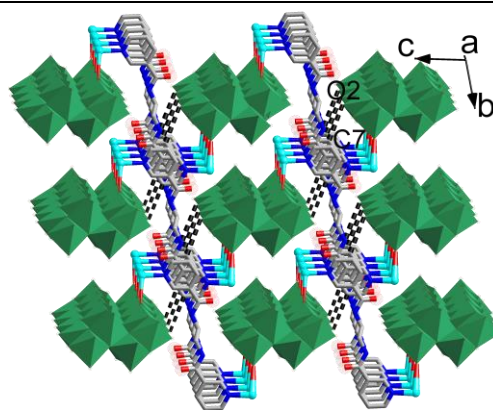

**Fig. S1.** The 3D supramolecular framework in **2**

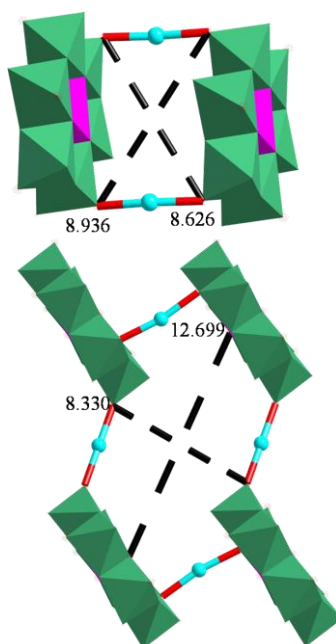

**Fig. S2.** Two kinds of the  $\text{Cu}_2(\text{TeMo}_6)_2$  and  $\text{Cu}_4(\text{TeMo}_6)_4$  loops in complex **6**

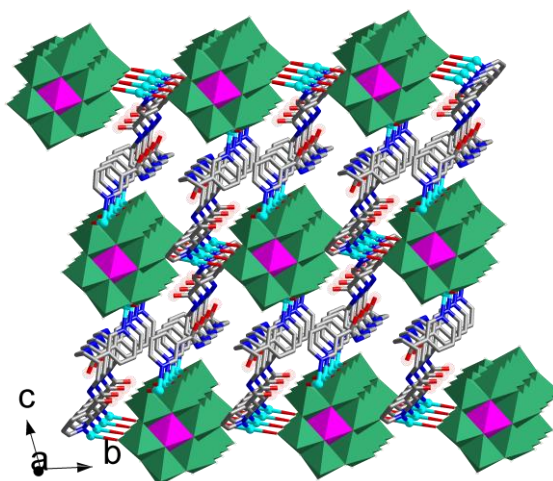

Fig. S3. The 3D framework of complex 6.

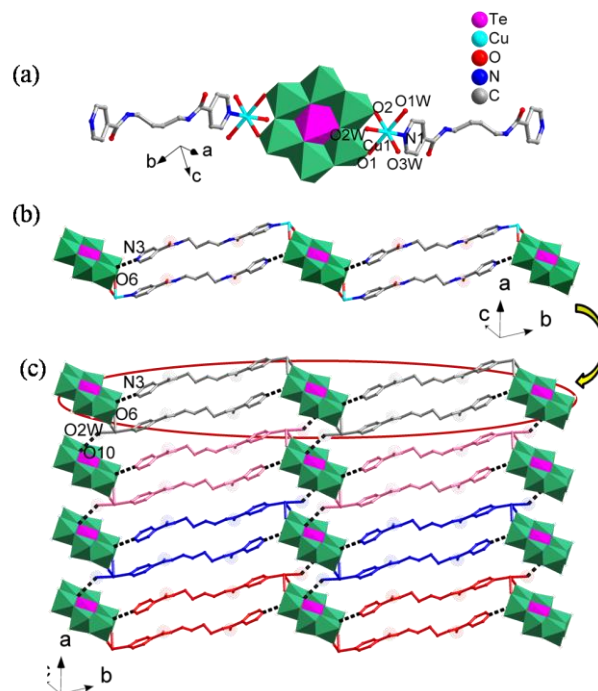

Fig. S4. (a) The coordination environment of the Cu<sup>II</sup> ion in 7. All H atoms and lattice water molecules are omitted for clarity. (b) The 1D supramolecular chain linked by hydrogen bonding interaction [N(3)–H(3B)⋯O(6)]. (c) The 2D supramolecular network of 7 formed by hydrogen bonding interaction [O2W–H2WB⋯O(10)].

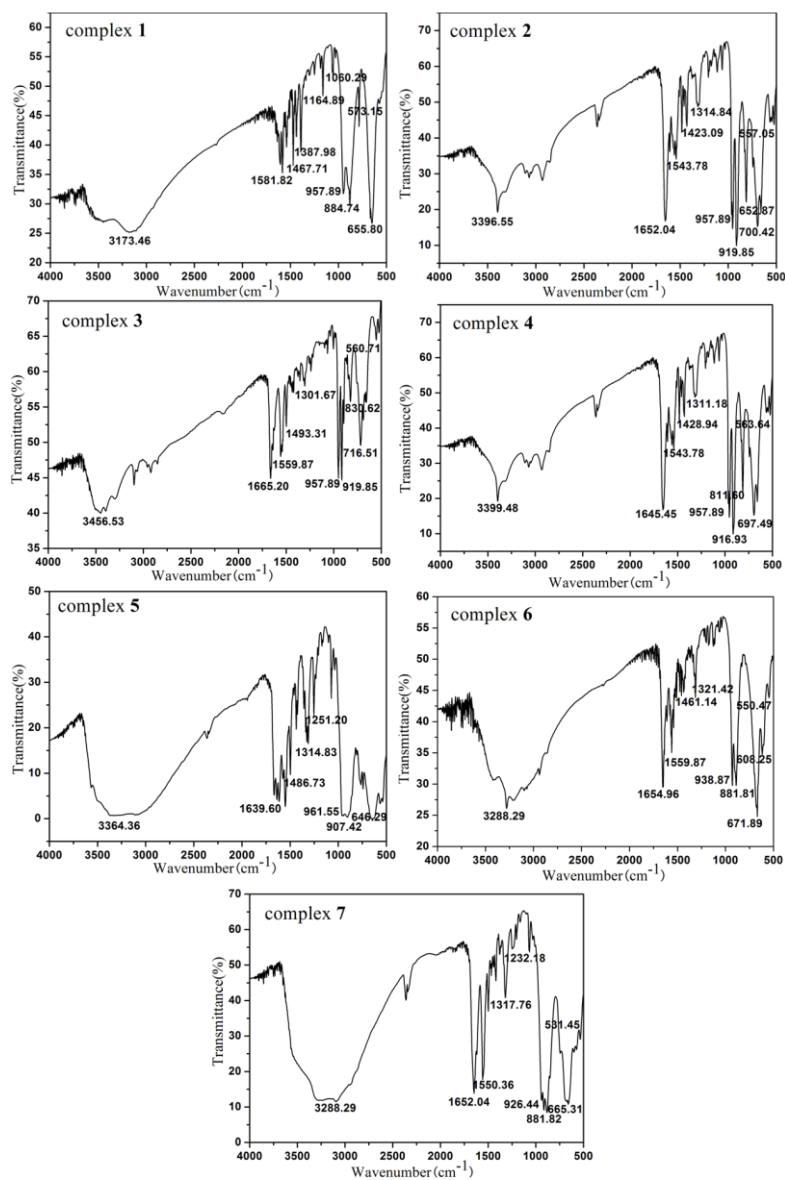

Fig. S5. The IR spectra of the title complexes.

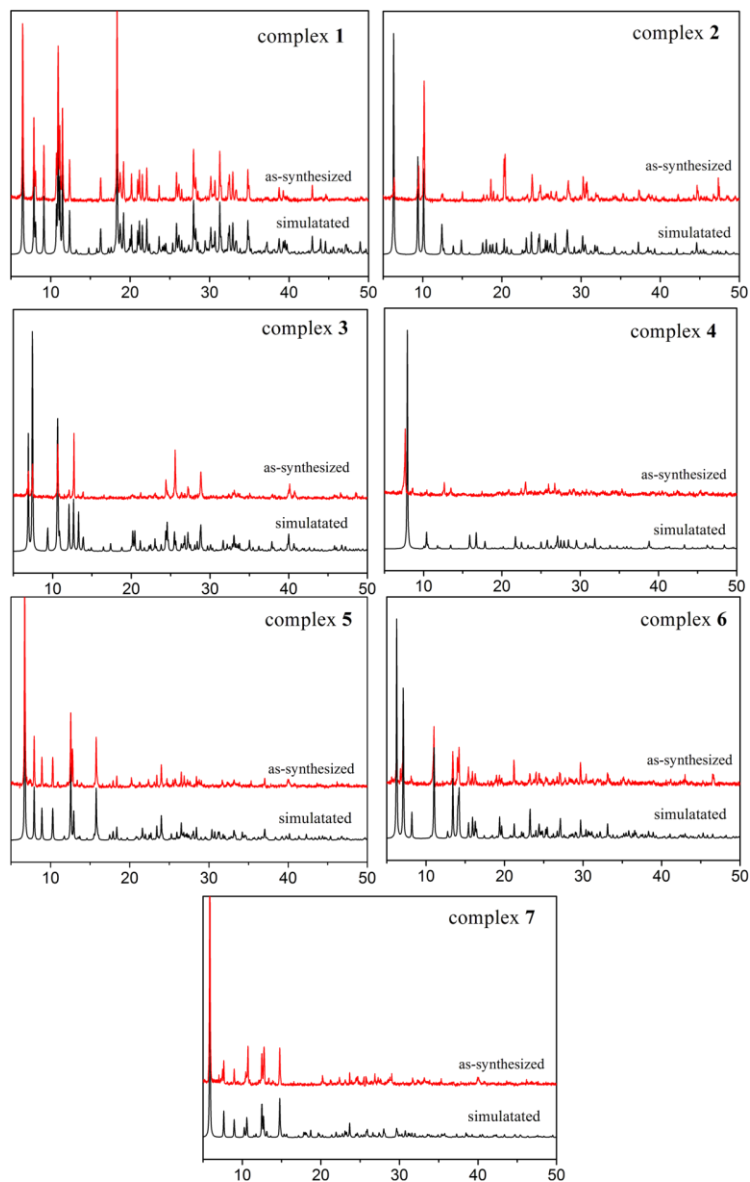

**Fig. S6.** Powder X-ray diffraction patterns of the title complexes.

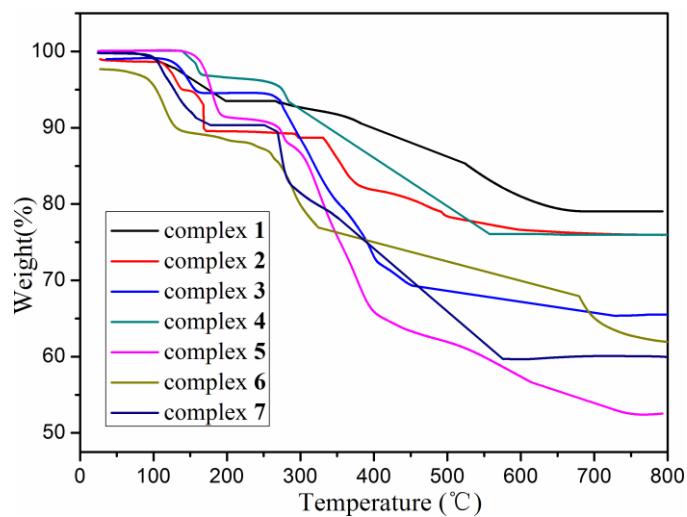

Fig. S7. The TGA curves of the title complexes.

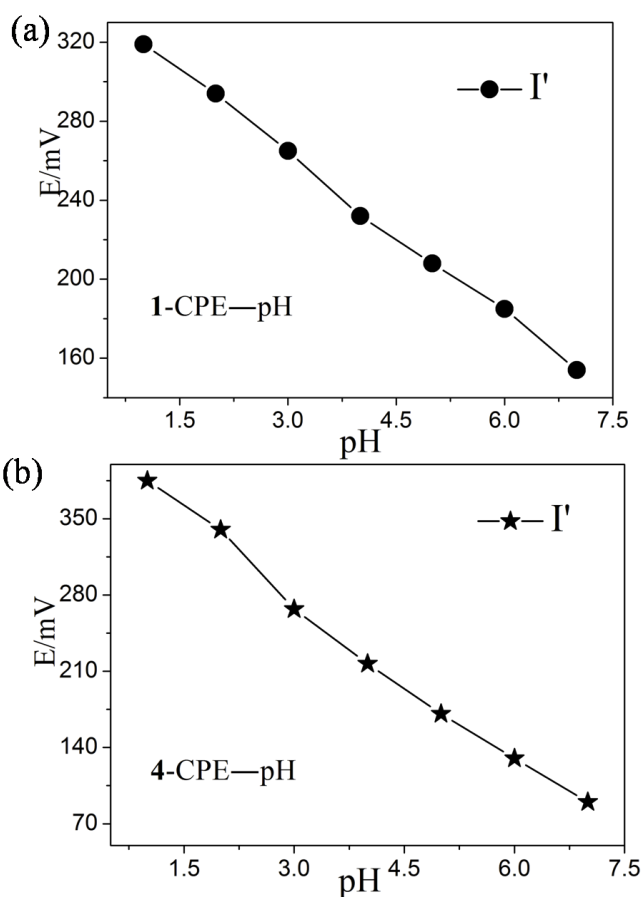

Fig. S8. The dependence of anodic peak potentials on the pH values of medium for 1–(a) and 4–(b)CPE.



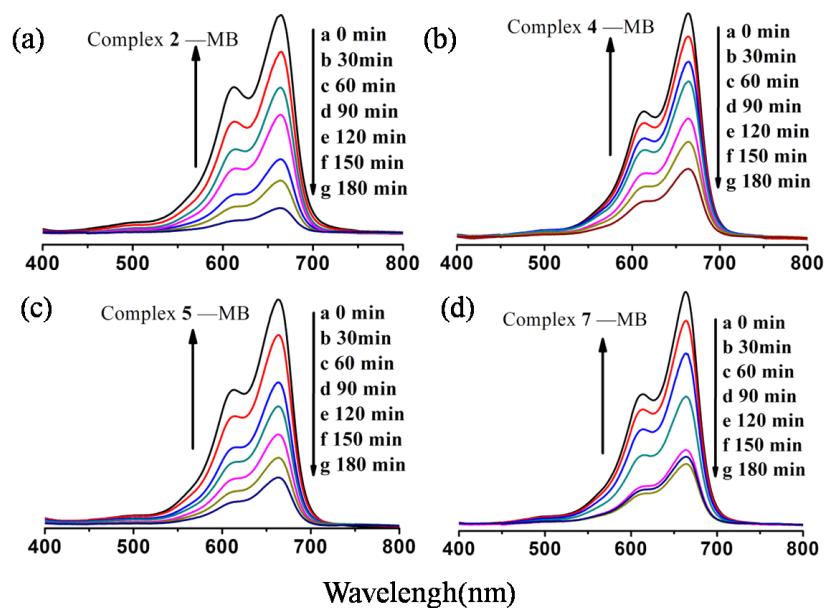

**Fig. S9.** Absorption spectra of the MB solution during the decomposition reaction under UV irradiation at the presence of complexes 2, 4, 5 and 7.

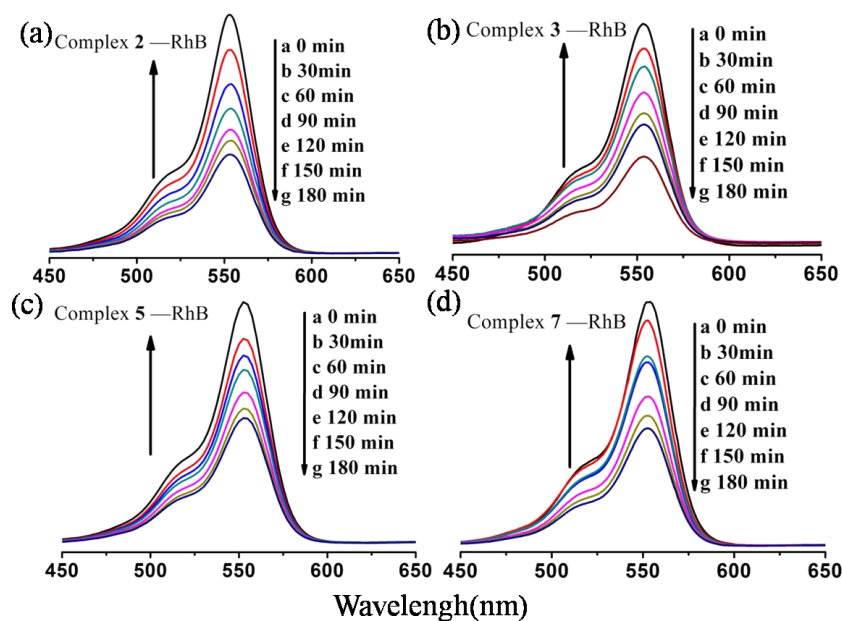

**Fig. S10.** Absorption spectra of the RhB solution during the decomposition reaction under UV irradiation at the presence of complexes 2, 3, 5 and 7.

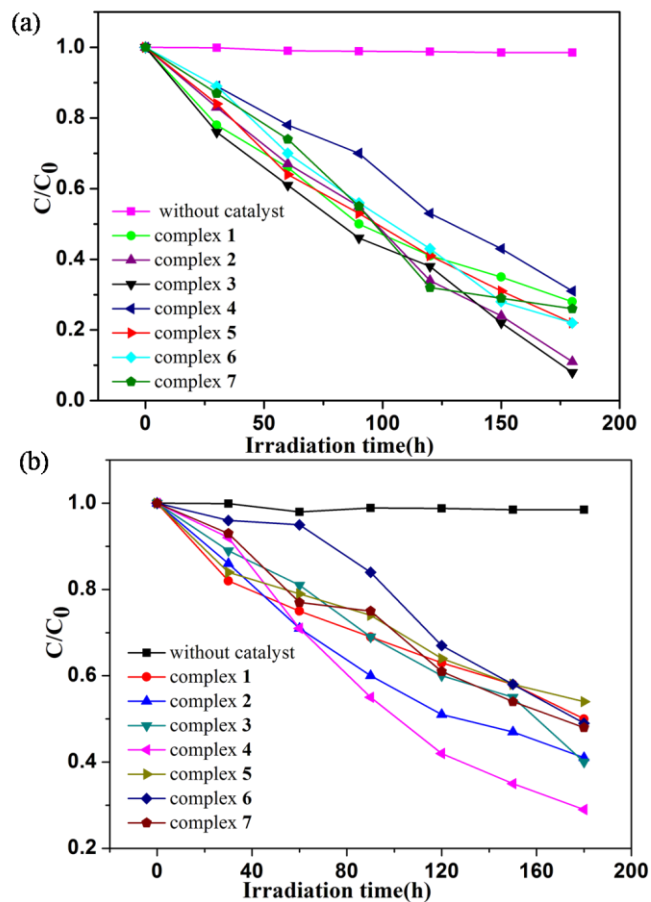

**Fig. S11** Photocatalytic decomposition rate of MB solution (a), and RhB (b) under UV irradiation with the use of title complexes.
